# Supplementary material for: Fast Evolution from Precast Bricks: Genomics of Young Freshwater Populations of Threespine Stickleback Gasterosteus aculeatus
Source: PubMed Central journal article supplement (PMC4191950; doi:10.1371/journal.pgen.1004696), 2014-10-09
Supplement: pgen.1004696.s005.pdf [file pgen.1004696.s005.pdf]

| DI     | Start      | End        | Nilma     | Ershovskoye<br>(anadromous) | Ershovskoye<br>(residential) | Martsy    | Goluboy   | Malysh    | Lobaneshskoye | Mashinnoye |
|--------|------------|------------|-----------|-----------------------------|------------------------------|-----------|-----------|-----------|---------------|------------|
| I-1    | 21,487,998 | 21,960,119 | 0.07±0.05 | 0.06±0.06                   | 0.54±0.09                    | 0.77±0.15 | 0.87±0.11 | 0.56±0.09 | 1±0.01        | 1±0.01     |
| II-1*  | 14,874,366 | 14,898,826 | 0.1±0.06  | 0.05±0.06                   | 0.23±0.04                    | 0.27±0.11 | 0.78±0.06 | 0.59±0.05 | 0.71±0.08     | 0.66±0.1   |
| IV-1   | 12,803,780 | 12,881,296 | 0.12±0.06 | 0.07±0.07                   | 0.38±0.09                    | 0.67±0.12 | 0.69±0.09 | 0.5±0.09  | 1±0.02        | 0.99±0.03  |
| IV-2   | 13,930,002 | 13,959,331 | 0.12±0.05 | 0.1±0.06                    | 0.46±0.09                    | 0.67±0.11 | 0.71±0.06 | 0.52±0.08 | 1±0.01        | 1±0        |
| IV-3   | 19,811,922 | 19,914,666 | 0.14±0.05 | 0.12±0.06                   | 0.44±0.1                     | 0.68±0.12 | 0.8±0.12  | 0.61±0.1  | 1±0.02        | 1±0.02     |
| IV-4   | 23,954,634 | 23,981,981 | 0.15±0.04 | 0.08±0.07                   | 0.48±0.08                    | 0.73±0.11 | 0.7±0.07  | 0.67±0.05 | 1±0           | 0.99±0.05  |
| IV-5*  | 26,016,955 | 26,166,536 | 0.14±0.04 | 0.11±0.06                   | 0.4±0.1                      | 0.71±0.13 | 0.57±0.09 | 0.67±0.07 | 1±0.03        | 0.69±0.12  |
| V-1    | 2,482,209  | 2,501,295  | 0.11±0.05 | 0.13±0.06                   | 0.56±0.1                     | 0.73±0.13 | 0.89±0.11 | 1±0       | 1±0.02        | 1±0        |
| VII-1* | 17,982,351 | 18,002,671 | 0.08±0.04 | 0.05±0.06                   | 0.05±0.05                    | 0.23±0.11 | 0.92±0.11 | 0.83±0.08 | 0.58±0.07     | 1±0        |
| IX-1*  | 8,521,935  | 8,537,559  | 0.11±0.05 | 0.04±0.06                   | 0.16±0.07                    | 0.43±0.11 | 0.55±0.09 | 0.69±0.06 | 0.55±0.04     | 0.79±0.15  |
| IX-2*  | 8,901,816  | 8,910,115  | 0.13±0.04 | 0.08±0.07                   | 0.22±0.09                    | 0.46±0.12 | 0.55±0.09 | 0.16±0.28 | 0.63±0.15     | 0.72±0.2   |
| IX-3   | 9,208,158  | 9,227,809  | 0.14±0.06 | 0.05±0.06                   | 0.41±0.09                    | 0.66±0.09 | 0.75±0.1  | 0.67±0.06 | 0.97±0.05     | 1±0        |
| IX-4   | 10,334,101 | 10,353,801 | 0.12±0.05 | 0.07±0.06                   | 0.28±0.08                    | 0.73±0.09 | 0.7±0.07  | 0.9±0.08  | 1±0.01        | 1±0.01     |
| XI-1*  | 5,445,757  | 5,855,124  | 0.05±0.05 | 0.03±0.05                   | 0.15±0.09                    | 0.48±0.12 | 0.78±0.1  | 0.1±0.08  | 0.73±0.11     | 0.79±0.14  |
| XII-1  | 14,338,229 | 14,358,336 | 0.15±0.04 | 0.1±0.06                    | 0.12±0.06                    | 0.41±0.11 | 0.84±0.11 | 0.83±0.08 | 1±0.02        | 1±0        |
| XII-2  | 16,522,028 | 16,538,810 | 0.08±0.06 | 0.05±0.07                   | 0.32±0.07                    | 0.41±0.1  | 0.98±0.03 | 0.29±0.06 | 0.94±0.08     | 0.99±0.02  |

|        |            |            |           |           |           |           |           |           |           |           |
|--------|------------|------------|-----------|-----------|-----------|-----------|-----------|-----------|-----------|-----------|
| XIX-1  | 2,449,903  | 2,581,858  | 0.13±0.05 | 0.07±0.06 | 0.36±0.1  | 0.92±0.13 | 0.75±0.12 | 0.68±0.09 | 1±0.02    | 1±0.01    |
| XIX-2  | 14,787,904 | 14,799,088 | 0.09±0.06 | 0.05±0.06 | 0.24±0.07 | 0.49±0.18 | 0.61±0.12 | 0.37±0.13 | 0.99±0.04 | 0.98±0.05 |
| XXI-1* | 5,759,879  | 7,486,635  | 0.01±0.02 | 0.03±0.05 | 0.36±0.09 | 0.59±0.13 | 0.47±0.1  | 0.01±0.05 | 0.69±0.11 | 0.59±0.08 |

**Table S2. Average frequencies of freshwater alleles in each population for each of the 19 DIs found in our study, mean ± st.**

**dev.** Asterisks denote the DIs identified under the weak criteria.
