# Supplementary material for: Fast Evolution from Precast Bricks: Genomics of Young Freshwater Populations of Threespine Stickleback Gasterosteus aculeatus
Source: PubMed Central journal article supplement (PMC4191950; doi:10.1371/journal.pgen.1004696), 2014-10-09
Supplement: pgen.1004696.s006.pdf [file pgen.1004696.s006.pdf]

| <b>DI/locus</b> | <b>SNP position</b> | <b>Primer</b>     | <b>Primer sequence</b>      | <b>Used with</b> | <b>Annealing T (°C)</b> |
|-----------------|---------------------|-------------------|-----------------------------|------------------|-------------------------|
| I-1             | chrI:21,698,392     | Chr1_F_R          | AGTCACTTACAAAACCAAGAAGCTTTC | Chr1_FS_F        | 68                      |
|                 |                     | Chr1_S_R          | TCAACTTACAAAACCAAGAAGCGG    | Chr1_FS_F        | 65                      |
|                 |                     | Chr1_FS_F         | AGGCCTTTTCACAGGCAGCCTC      |                  |                         |
| IV-1            | chrIV:12,802,776    | Stn382F (Ref. 27) | CCCTTAGAGAATTTCTTAGCAG      | Stn382R          | 56                      |
|                 | - chrIV:12,802,926  | Stn382R (Ref. 27) | CTTGTCCCGGATCATACGC         |                  |                         |
| IV-3            | chrIV:19,875,745    | Chr4-3_F_F        | TATTAAGCACTGATCCAATTCTTAT   | Chr4-3_FS_R      | 65                      |
|                 |                     | Chr4-3_S_F        | TATTAAGCACTGATCCAATTCTTGA   | Chr4-3_FS_R      | 65                      |
|                 |                     | Chr4-3_FS_R       | CTCTCAGCAAAGTGGGACTGCAGT    |                  |                         |
| IV-4            | chrIV:23,963,712    | Chr4-4_F_R        | ATCCTGGTTCTGTGACCTAATGCTC   | Chr4-4_FS_F      | 63                      |
|                 |                     | Chr4-4_S_R        | ATCCTGGTTCTGTGCCTAATGTTG    | Chr4-4_FS_F      | 63                      |
|                 |                     | Chr4-4_FS_F       | AAGTGGCGTGGCACAGAGAAGTAC    |                  |                         |
| IX-4            | chrIX:10,338,733    | Chr9-1_F_F        | AGCGCTTCCAAAGGAGTTCTGAG     | Chr9-1_SF_R      | 68                      |
|                 |                     | Chr9-1_S_F        | CAGCGCTTCCAAAGGAGTTCTGTA    | Chr9-1_SF_R      | 63                      |
|                 |                     | Chr9-1_SF_R       | TGTGCCAACCCGCCATCATA        |                  |                         |
| XIX-1a          | chrXIX:2,475,523    | Chr19a_F_F        | GGTACAACAACAATTCATGCACT     | Chr19a_SF_R      | 65                      |
|                 |                     | Chr19a_S_F        | GACTACAACAACAATTCATGCATA    | Chr19a_SF_R      | 65                      |
|                 |                     | Chr19a_SF_R       | ATGAGCGACAACAATAAACAATGC    |                  |                         |

|        |                  |             |                             |             |    |
|--------|------------------|-------------|-----------------------------|-------------|----|
| XIX-1b | chrXIX:2,460,316 | Chr19b_F_F  | AGACAAACTGCCACAAAAGATGAAACA | Chr19b_SF_R | 68 |
|        |                  | Chr19b_S_F  | AGACAAACTGCCACAAAAAATGAAATG | Chr19b_SF_R | 63 |
|        |                  | Chr19b_SF_R | CTCTGTAAACGATTGGTCCAGTGTCAC |             |    |
| XXI-1* | chrXXI:6,926,742 | Chr21b_F_F  | CAATGATTTAACCTGTTGACAGC     | Chr21b_FS_R | 68 |
|        |                  | Chr21b_S_F  | GTCAATGATTTAACCTGTTGACATA   | Chr21b_FS_R | 63 |
|        |                  | Chr21b_FS_R | CAGTAATGGTGGGTCAGTGTACGT    |             |    |

**Table S3. List of allele-specific primers used for DIs validation.**
