# Supplementary material for: Fast Evolution from Precast Bricks: Genomics of Young Freshwater Populations of Threespine Stickleback Gasterosteus aculeatus
Source: PubMed Central journal article supplement (PMC4191950; doi:10.1371/journal.pgen.1004696), 2014-10-09
Supplement: pgen.1004696.s007.pdf [file pgen.1004696.s007.pdf]

| DI/locus | Nilma |           | Ershovskoye (anadromous) |           | Ershovskoye (residential) |           | Martsy |           |
|----------|-------|-----------|--------------------------|-----------|---------------------------|-----------|--------|-----------|
|          | PCR   | Illumina  | PCR                      | Illumina  | PCR                       | Illumina  | PCR    | Illumina  |
| I-1      | 0.125 | 0.07±0.05 | 0                        | 0.06±0.06 | 0.500                     | 0.54±0.09 | 0.750  | 0.77±0.15 |
| IV-1     | 0.125 | 0.12±0.06 | 0.125                    | 0.07±0.07 | 0.417                     | 0.38±0.09 | 0.700  | 0.67±0.12 |
| IV-3     | 0.156 | 0.14±0.05 | 0.15                     | 0.12±0.06 | 0.458                     | 0.44±0.1  | 0.750  | 0.68±0.12 |
| IV-4     | 0.156 | 0.15±0.04 | 0.2                      | 0.08±0.07 | 0.458                     | 0.48±0.08 | 0.650  | 0.73±0.11 |
| IX-4     | 0.156 | 0.12±0.05 | 0.05                     | 0.07±0.06 | 0.208                     | 0.28±0.08 | 0.700  | 0.73±0.09 |
| XIX-1a   | 0.094 | 0.13±0.05 | -                        | 0.07±0.06 | 0.375                     | 0.36±0.1  | 0.750  | 0.92±0.13 |
| XIX-1b   | 0.094 | 0.13±0.05 | 0.05                     | 0.07±0.06 | 0.250                     | 0.36±0.1  | 0.850  | 0.92±0.13 |
| XXI-1*   | 0.000 | 0.01±0.02 | -                        | 0.03±0.05 | 0.333                     | 0.36±0.09 | 0.550  | 0.59±0.13 |

| DI/locus | Goluboy |           | Malysh |           | Lobaneshskoye |          | Mashinnoye |           |
|----------|---------|-----------|--------|-----------|---------------|----------|------------|-----------|
|          | PCR     | Illumina  | PCR    | Illumina  | PCR           | Illumina | PCR        | Illumina  |
| I-1      | 0.850   | 0.87±0.11 | 0.525  | 0.56±0.09 | 1.000         | 1±0.01   | 1.000      | 1±0.01    |
| IV-1     | 0.700   | 0.69±0.09 | 0.525  | 0.5±0.09  | 0.938         | 1±0.02   | 0.900      | 0.99±0.03 |

|        |       |           |       |           |       |           |       |           |
|--------|-------|-----------|-------|-----------|-------|-----------|-------|-----------|
| IV-3   | 0.875 | 0.8±0.12  | 0.650 | 0.61±0.1  | 1.000 | 1±0.02    | 1.000 | 1±0.02    |
| IV-4   | 0.700 | 0.7±0.07  | 0.675 | 0.67±0.05 | 1.000 | 1±0       | 0.900 | 0.99±0.05 |
| IX-4   | 0.750 | 0.7±0.07  | 0.700 | 0.9±0.08  | 1.000 | 1±0.01    | 1.000 | 1±0.01    |
| XIX-1a | 0.775 | 0.75±0.12 | 0.650 | 0.68±0.09 | 1.000 | 1±0.02    | 1.000 | 1±0.01    |
| XIX-1b | 0.775 | 0.75±0.12 | 0.675 | 0.68±0.09 | 1.000 | 1±0.02    | 1.000 | 1±0.01    |
| XXI-1* | 0.350 | 0.47±0.1  | 0.000 | 0.01±0.05 | 0.688 | 0.69±0.11 | 0.450 | 0.59±0.08 |

**Table S4. Comparison of freshwater allele frequencies based on allele-specific PCR and on calculation of marker SNP frequencies.**
