# Supplementary material for: Fast Evolution from Precast Bricks: Genomics of Young Freshwater Populations of Threespine Stickleback Gasterosteus aculeatus
Source: PubMed Central journal article supplement (PMC4191950; doi:10.1371/journal.pgen.1004696), 2014-10-09
Supplement: pgen.1004696.s008.pdf [file pgen.1004696.s008.pdf]

|         | mpileup           |                   |              |                | GATK              |                   |              |                |
|---------|-------------------|-------------------|--------------|----------------|-------------------|-------------------|--------------|----------------|
| #chr    | start             | end               | #markers     | length         | start             | end               | #markers     | length         |
| chrI    |                   |                   |              |                | 12,386,698        | 12,398,661        | 30           | 11,964         |
| chrI    | <b>21,487,998</b> | <b>21,960,119</b> | <b>4,186</b> | <b>472,122</b> | <b>21,486,723</b> | <b>21,960,546</b> | <b>4,071</b> | <b>473,824</b> |
| chrII   |                   |                   |              |                | <b>400,967</b>    | <b>410,723</b>    | <b>11</b>    | <b>9,757</b>   |
| chrII   |                   |                   |              |                | <b>6,125,444</b>  | <b>6,133,126</b>  | <b>11</b>    | <b>7,683</b>   |
| chrII   | 14,874,366        | 14,898,826        | 73           | 24,461         | 14,868,709        | 14,903,504        | 133          | 34,796         |
| chrII   |                   |                   |              |                | 15,917,413        | 15,927,588        | 22           | 10,176         |
| chrIII  |                   |                   |              |                | <b>12,393,053</b> | <b>12,401,196</b> | <b>12</b>    | <b>8,144</b>   |
| chrIV   | <b>12,803,780</b> | <b>12,881,296</b> | <b>285</b>   | <b>77,517</b>  | <b>12,801,904</b> | <b>12,884,281</b> | <b>368</b>   | <b>82,378</b>  |
| chrIV   | <b>13,930,002</b> | <b>13,959,331</b> | <b>168</b>   | <b>29,330</b>  | <b>13,930,002</b> | <b>13,965,650</b> | <b>180</b>   | <b>35,649</b>  |
| chrIV   | <b>19,811,922</b> | <b>19,914,666</b> | <b>209</b>   | <b>102,745</b> | <b>19,811,668</b> | <b>19,914,285</b> | <b>235</b>   | <b>102,618</b> |
| chrIV   |                   |                   |              |                | <b>21,119,742</b> | <b>21,129,459</b> | <b>13</b>    | <b>9,718</b>   |
| chrIV   | <b>23,954,634</b> | <b>23,981,981</b> | <b>48</b>    | <b>27,348</b>  | <b>23,926,875</b> | <b>23,982,004</b> | <b>126</b>   | <b>55,130</b>  |
| chrIV   | 26,016,955        | 26,166,536        | 252          | 149,582        | 26,014,651        | 26,173,878        | 364          | 159,228        |
| chrIV   |                   |                   |              |                | <b>27,506,950</b> | <b>27,529,635</b> | <b>24</b>    | <b>22,686</b>  |
| chrV    | <b>2,482,209</b>  | <b>2,501,295</b>  | <b>65</b>    | <b>19,087</b>  | <b>2,482,368</b>  | <b>2,507,363</b>  | <b>52</b>    | <b>24,996</b>  |
| chrVII  |                   |                   |              |                | <b>4,673,859</b>  | <b>4,684,431</b>  | <b>11</b>    | <b>10,573</b>  |
| chrVII  | 17,982,351        | 18,002,671        | 84           | 20,321         | 17,971,522        | 18,009,091        | 131          | 37,570         |
| chrVIII |                   |                   |              |                | 8,251,224         | 8,259,722         | 20           | 8,499          |
| chrIX   | 8,521,935         | 8,537,559         | 44           | 15,625         | 8,511,171         | 8,537,543         | 106          | 26,373         |

|          |                   |                   |            |                |                   |                   |            |                |
|----------|-------------------|-------------------|------------|----------------|-------------------|-------------------|------------|----------------|
| chrIX    | 8,901,816         | 8,910,115         | 20         | 8,300          | 8,901,816         | 8,910,874         | 42         | 9,059          |
| chrIX    | <b>9,208,158</b>  | <b>9,227,809</b>  | <b>46</b>  | <b>19,652</b>  | <b>9,129,464</b>  | <b>9,232,163</b>  | <b>109</b> | <b>102,700</b> |
| chrIX    | <b>10,334,101</b> | <b>10,353,801</b> | <b>114</b> | <b>19,701</b>  | <b>10,327,579</b> | <b>10,353,801</b> | <b>90</b>  | <b>26,223</b>  |
| chrIX    |                   |                   |            |                | 12,066,123        | 12,181,815        | 67         | 115,693        |
| chrX     |                   |                   |            |                | 8,301,947         | 8,311,946         | 20         | 10,000         |
| chrXI    | 5,445,757         | 5,855,124         | 1,237      | 409,368        | 5,436,982         | 5,915,286         | 3,112      | 478,305        |
| chrXII   | <b>14,338,229</b> | <b>14,358,336</b> | <b>91</b>  | <b>20,108</b>  | <b>14,329,844</b> | <b>14,357,195</b> | <b>75</b>  | <b>27,352</b>  |
| chrXII   | <b>16,522,028</b> | <b>16,538,810</b> | <b>24</b>  | <b>16,783</b>  | <b>16,521,493</b> | <b>16,538,557</b> | <b>30</b>  | <b>17,065</b>  |
| chrXIII  |                   |                   |            |                | 8,447,744         | 8,457,144         | 29         | 9,401          |
| chrXIV   |                   |                   |            |                | <b>11,349,733</b> | <b>11,361,406</b> | <b>21</b>  | <b>11,674</b>  |
| chrXVIII |                   |                   |            |                | <b>882,850</b>    | <b>906,041</b>    | <b>63</b>  | <b>23,192</b>  |
| chrXIX   | <b>2,449,903</b>  | <b>2,581,858</b>  | <b>277</b> | <b>131,956</b> | <b>2,449,903</b>  | <b>2,575,655</b>  | <b>252</b> | <b>125,753</b> |
| chrXIX   |                   |                   |            |                | <b>12,488,785</b> | <b>12,497,245</b> | <b>10</b>  | <b>8,461</b>   |
| chrXIX   | <b>14,787,904</b> | <b>14,799,088</b> | <b>21</b>  | <b>11,185</b>  | 14,775,739        | 14,807,299        | 98         | 31,561         |
| chrXX    |                   |                   |            |                | 8,626,815         | 8,651,960         | 50         | 25,146         |
| chrXXI   | 5,759,879         | 7,486,635         | 6,900      | 1,726,757      | 5,757,848         | 7,491,073         | 13,508     | 1,733,226      |
| Total    |                   |                   | 14,144     | 3,301,948      |                   |                   | 23,496     | 3,886,573      |

**Table S5. Comparison of the two programs mpileup and GATK for identification marker SNPs.** Bold font denotes DIs

identified under the strong criteria, non-bold font denotes DIs identified under the weak criteria.
