# Supplementary material for: Fast Evolution from Precast Bricks: Genomics of Young Freshwater Populations of Threespine Stickleback Gasterosteus aculeatus
Source: PubMed Central journal article supplement (PMC4191950; doi:10.1371/journal.pgen.1004696), 2014-10-09
Supplement: pgen.1004696.s009.pdf [file pgen.1004696.s009.pdf]

| DI    | Start      | End        | Nilma     | Ershovskoye<br>(anadromous) | Ershovskoye<br>(residential) | Martsy    | Goluboy   | Malysh    | Lobaneshskoye | Mashinnoye |
|-------|------------|------------|-----------|-----------------------------|------------------------------|-----------|-----------|-----------|---------------|------------|
| I-1*  | 12,386,698 | 12,398,661 | 0.14±0.04 | 0.04±0.06                   | 0.16±0.11                    | 0.46±0.17 | 0.73±0.08 | 0.22±0.21 | 0.74±0.11     | 0.95±0.09  |
| I-2   | 21,486,723 | 21,960,546 | 0.09±0.05 | 0.07±0.07                   | 0.54±0.1                     | 0.79±0.11 | 0.85±0.08 | 0.58±0.11 | 0.99±0.03     | 1±0.02     |
| II-1  | 400,967    | 410,723    | 0.17±0.02 | 0.03±0.04                   | 0.23±0.08                    | 0.45±0.16 | 0.71±0.07 | 0.43±0.05 | 0.83±0.03     | 0.99±0.03  |
| II-2  | 6,125,444  | 6,133,126  | 0.15±0.04 | 0.12±0.08                   | 0.53±0.12                    | 0.74±0.11 | 0.84±0.06 | 0.48±0.2  | 0.97±0.06     | 1±0        |
| II-3* | 14,868,709 | 14,903,504 | 0.11±0.04 | 0.06±0.07                   | 0.26±0.08                    | 0.29±0.12 | 0.79±0.08 | 0.6±0.07  | 0.73±0.1      | 0.69±0.1   |
| II-4* | 15,917,413 | 15,927,588 | 0.13±0.05 | 0.04±0.06                   | 0.43±0.13                    | 0.43±0.14 | 0.69±0.12 | 0.63±0.12 | 0.63±0.13     | 0.75±0.1   |
| III-1 | 12,393,053 | 12,401,196 | 0.14±0.03 | 0.06±0.07                   | 0.43±0.14                    | 0.52±0.13 | 0.74±0.1  | 0.88±0.04 | 0.94±0.07     | 0.98±0.05  |
| IV-1  | 12,801,904 | 12,884,281 | 0.13±0.04 | 0.06±0.07                   | 0.37±0.1                     | 0.69±0.13 | 0.69±0.1  | 0.5±0.1   | 0.98±0.04     | 0.97±0.06  |
| IV-2  | 13,930,002 | 13,965,650 | 0.12±0.05 | 0.1±0.07                    | 0.46±0.1                     | 0.74±0.11 | 0.73±0.08 | 0.54±0.1  | 1±0.02        | 1±0.02     |
| IV-3  | 19,811,668 | 19,914,285 | 0.14±0.04 | 0.12±0.06                   | 0.44±0.12                    | 0.73±0.12 | 0.82±0.09 | 0.63±0.11 | 0.98±0.04     | 0.98±0.05  |
| IV-4  | 21,119,742 | 21,129,459 | 0.15±0.04 | 0.13±0.05                   | 0.38±0.1                     | 0.71±0.19 | 0.79±0.12 | 0.91±0.07 | 1±0.02        | 0.98±0.06  |
| IV-5  | 23,926,875 | 23,982,004 | 0.15±0.04 | 0.07±0.07                   | 0.46±0.12                    | 0.76±0.1  | 0.71±0.09 | 0.7±0.08  | 1±0.02        | 0.87±0.06  |
| IV-6* | 26,014,651 | 26,173,878 | 0.14±0.04 | 0.12±0.07                   | 0.41±0.09                    | 0.78±0.1  | 0.61±0.09 | 0.69±0.08 | 1±0.02        | 0.74±0.1   |
| IV-7  | 27,506,950 | 27,529,635 | 0.11±0.05 | 0.18±0.02                   | 0.19±0.07                    | 0.42±0.14 | 0.74±0.13 | 0±0.01    | 0.98±0.05     | 0.96±0.06  |
| V-1   | 2,482,368  | 2,507,363  | 0.11±0.05 | 0.11±0.08                   | 0.56±0.1                     | 0.79±0.12 | 0.86±0.06 | 1±0.01    | 0.96±0.05     | 1±0.01     |
| VII-1 | 4,673,859  | 4,684,431  | 0.07±0.05 | 0.12±0.09                   | 0.2±0.1                      | 0.31±0.18 | 0.76±0.07 | 0.41±0.18 | 0.92±0.08     | 1±0.02     |

|          |            |            |           |           |           |           |           |           |           |           |
|----------|------------|------------|-----------|-----------|-----------|-----------|-----------|-----------|-----------|-----------|
| VII-2*   | 17,971,522 | 18,009,091 | 0.09±0.04 | 0.07±0.07 | 0.06±0.06 | 0.24±0.11 | 0.88±0.06 | 0.84±0.05 | 0.58±0.09 | 1±0.02    |
| VIII-1*  | 8,251,224  | 8,259,722  | 0.12±0.03 | 0.04±0.07 | 0.11±0.05 | 0.28±0.13 | 0.45±0.1  | 0.3±0.14  | 0.58±0.11 | 0.81±0.16 |
| IX-1*    | 8,511,171  | 8,537,543  | 0.12±0.04 | 0.05±0.06 | 0.15±0.06 | 0.46±0.14 | 0.57±0.09 | 0.7±0.06  | 0.58±0.09 | 0.78±0.12 |
| IX-2*    | 8,901,816  | 8,910,874  | 0.14±0.04 | 0.07±0.08 | 0.19±0.1  | 0.47±0.15 | 0.54±0.13 | 0.28±0.33 | 0.68±0.17 | 0.78±0.19 |
| IX-3     | 9,129,464  | 9,232,163  | 0.13±0.04 | 0.06±0.07 | 0.42±0.09 | 0.63±0.13 | 0.71±0.12 | 0.65±0.07 | 0.89±0.06 | 0.97±0.06 |
| IX-4     | 10,327,579 | 10,353,801 | 0.13±0.04 | 0.08±0.07 | 0.29±0.09 | 0.79±0.08 | 0.71±0.08 | 0.88±0.04 | 0.98±0.05 | 1±0       |
| IX-5     | 12,066,123 | 12,181,815 | 0.1±0.06  | 0.09±0.07 | 0.38±0.13 | 0.54±0.16 | 0.55±0.16 | 0.65±0.21 | 0.7±0.09  | 0.73±0.15 |
| X-1      | 8,301,947  | 8,311,946  | 0.07±0.06 | 0.03±0.06 | 0.23±0.07 | 0.22±0.1  | 0.66±0.07 | 0.7±0.07  | 0.61±0.1  | 0.73±0.09 |
| XI-1     | 5,436,982  | 5,915,286  | 0.08±0.05 | 0.05±0.06 | 0.16±0.07 | 0.52±0.14 | 0.81±0.08 | 0.13±0.07 | 0.76±0.1  | 0.8±0.1   |
| XII-1    | 14,329,844 | 14,357,195 | 0.15±0.04 | 0.11±0.07 | 0.13±0.07 | 0.41±0.13 | 0.85±0.07 | 0.83±0.06 | 0.98±0.05 | 1±0.02    |
| XII-2    | 16,521,493 | 16,538,557 | 0.1±0.04  | 0.09±0.08 | 0.32±0.09 | 0.4±0.13  | 0.94±0.04 | 0.28±0.07 | 0.88±0.05 | 1±0.02    |
| XIII-1   | 8,447,744  | 8,457,144  | 0.13±0.05 | 0.07±0.07 | 0.15±0.04 | 0.81±0.1  | 0.73±0.08 | 0.59±0.17 | 0.86±0.03 | 0.99±0.03 |
| XIV-1    | 11,349,733 | 11,361,406 | 0.11±0.06 | 0.15±0.05 | 0.3±0.06  | 0.18±0.09 | 0.73±0.08 | 0.27±0.06 | 0.87±0.05 | 0.89±0.08 |
| XVIII-1* | 882,850    | 906,041    | 0.13±0.04 | 0.09±0.07 | 0.22±0.08 | 0.48±0.13 | 0.29±0.12 | 0.72±0.12 | 0.78±0.09 | 0.68±0.12 |
| XIX-1    | 2,449,903  | 2,575,655  | 0.14±0.05 | 0.07±0.07 | 0.37±0.1  | 0.83±0.1  | 0.78±0.11 | 0.71±0.1  | 0.98±0.05 | 0.98±0.05 |
| XIX-2    | 12,488,785 | 12,497,245 | 0.1±0.04  | 0.02±0.04 | 0.01±0.04 | 0.09±0.1  | 0.5±0.08  | 0.41±0.1  | 0.98±0.06 | 0.98±0.05 |
| XIX-3*   | 14,775,739 | 14,807,299 | 0.09±0.05 | 0.07±0.07 | 0.21±0.09 | 0.48±0.16 | 0.58±0.16 | 0.32±0.11 | 0.84±0.15 | 0.8±0.15  |

|        |           |           |           |           |           |           |           |           |           |           |
|--------|-----------|-----------|-----------|-----------|-----------|-----------|-----------|-----------|-----------|-----------|
| XX-1*  | 8,626,815 | 8,651,960 | 0.11±0.04 | 0.16±0.05 | 0.43±0.1  | 0.65±0.13 | 0.7±0.11  | 0.54±0.14 | 0.87±0.15 | 0.72±0.13 |
| XXI-1* | 5,757,848 | 7,491,073 | 0.01±0.02 | 0.04±0.06 | 0.38±0.11 | 0.64±0.13 | 0.51±0.11 | 0.01±0.06 | 0.73±0.1  | 0.62±0.1  |

**Table S6. Average frequencies of freshwater alleles in each population for each of the 35 DIs defined with the GATK in our study, mean ± st. dev.**
