# Supplementary material for: Fast Evolution from Precast Bricks: Genomics of Young Freshwater Populations of Threespine Stickleback Gasterosteus aculeatus
Source: PubMed Central journal article supplement (PMC4191950; doi:10.1371/journal.pgen.1004696), 2014-10-09
Supplement: pgen.1004696.s010.pdf [file pgen.1004696.s010.pdf]

| DI     | Start      | End        | Nilma     | Ershovskoye<br>(anadromous) | Ershovskoye<br>(residential) | Martsy    | Goluboy   | Malysh    | Lobaneshskoye | Mashinnoye |
|--------|------------|------------|-----------|-----------------------------|------------------------------|-----------|-----------|-----------|---------------|------------|
| chrI   | 21,487,998 | 21,523,284 | 0.07±0.05 | 0.06±0.06                   | 0.52±0.08                    | 0.74±0.13 | 0.85±0.12 | 0.55±0.08 | 1±0.01        | 1±0        |
| chrI   | 21,524,624 | 21,549,574 | 0.06±0.06 | 0.06±0.07                   | 0.58±0.09                    | 0.8±0.15  | 0.88±0.11 | 0.58±0.11 | 1±0.02        | 1±0.02     |
| chrI   | 21,553,963 | 21,871,117 | 0.07±0.05 | 0.06±0.06                   | 0.54±0.09                    | 0.77±0.15 | 0.87±0.11 | 0.57±0.09 | 1±0.01        | 1±0.01     |
| chrI   | 21,872,973 | 21,960,119 | 0.07±0.05 | 0.06±0.06                   | 0.53±0.09                    | 0.77±0.15 | 0.86±0.12 | 0.56±0.1  | 1±0.02        | 1±0.02     |
| chrII* | 14,874,366 | 14,898,826 | 0.1±0.06  | 0.05±0.06                   | 0.23±0.04                    | 0.27±0.11 | 0.78±0.06 | 0.59±0.05 | 0.71±0.08     | 0.66±0.1   |
| chrIV  | 12,803,780 | 12,843,813 | 0.13±0.06 | 0.07±0.07                   | 0.41±0.09                    | 0.69±0.1  | 0.69±0.08 | 0.49±0.09 | 1±0.02        | 0.99±0.03  |
| chrIV  | 12,859,609 | 12,881,296 | 0.12±0.05 | 0.08±0.06                   | 0.33±0.08                    | 0.62±0.13 | 0.68±0.09 | 0.5±0.09  | 0.99±0.03     | 0.99±0.02  |
| chrIV  | 13,930,002 | 13,959,331 | 0.12±0.05 | 0.1±0.06                    | 0.46±0.09                    | 0.67±0.11 | 0.71±0.06 | 0.52±0.08 | 1±0.01        | 1±0        |
| chrIV  | 19,811,922 | 19,821,885 | 0.09±0.07 | 0.06±0.08                   | 0.32±0.09                    | 0.62±0.07 | 0.74±0.08 | 0.55±0.16 | 0.97±0.05     | 0.96±0.05  |
| chrIV  | 19,851,933 | 19,914,666 | 0.14±0.04 | 0.12±0.06                   | 0.45±0.09                    | 0.69±0.12 | 0.81±0.12 | 0.62±0.09 | 1±0           | 1±0        |
| chrIV  | 23,954,634 | 23,981,981 | 0.15±0.04 | 0.08±0.07                   | 0.48±0.08                    | 0.73±0.11 | 0.7±0.07  | 0.67±0.05 | 1±0           | 0.99±0.05  |
| chrIV* | 26,016,955 | 26,026,868 | 0.14±0.04 | 0.11±0.05                   | 0.42±0.08                    | 0.8±0.16  | 0.59±0.08 | 0.69±0.05 | 1±0.01        | 0.76±0.19  |
| chrIV* | 26,027,377 | 26,040,477 | 0.14±0.05 | 0.1±0.06                    | 0.39±0.1                     | 0.76±0.1  | 0.57±0.06 | 0.66±0.07 | 0.99±0.04     | 0.7±0.1    |
| chrIV* | 26,047,625 | 26,071,783 | 0.14±0.04 | 0.12±0.06                   | 0.42±0.09                    | 0.71±0.09 | 0.58±0.09 | 0.67±0.07 | 1±0           | 0.69±0.13  |
| chrIV* | 26,079,387 | 26,091,546 | 0.14±0.04 | 0.09±0.07                   | 0.41±0.09                    | 0.76±0.1  | 0.57±0.09 | 0.66±0.07 | 0.99±0.04     | 0.68±0.11  |
| chrIV* | 26,110,063 | 26,117,725 | 0.14±0.05 | 0.11±0.08                   | 0.39±0.15                    | 0.77±0.17 | 0.54±0.12 | 0.68±0.09 | 1±0.01        | 0.67±0.11  |

|         |            |            |           |           |           |           |           |           |           |           |
|---------|------------|------------|-----------|-----------|-----------|-----------|-----------|-----------|-----------|-----------|
| chrIV*  | 26,127,316 | 26,146,758 | 0.14±0.04 | 0.11±0.06 | 0.42±0.07 | 0.7±0.09  | 0.57±0.06 | 0.65±0.07 | 1±0.01    | 0.65±0.07 |
| chrIV*  | 26,156,442 | 26,166,536 | 0.15±0.05 | 0.09±0.07 | 0.32±0.1  | 0.54±0.12 | 0.54±0.1  | 0.65±0.09 | 0.98±0.05 | 0.76±0.13 |
| chrV    | 2,482,209  | 2,501,295  | 0.11±0.05 | 0.13±0.06 | 0.56±0.1  | 0.73±0.13 | 0.89±0.11 | 1±0       | 1±0.02    | 1±0       |
| chrVII* | 17,982,351 | 18,002,671 | 0.08±0.04 | 0.05±0.06 | 0.05±0.05 | 0.23±0.11 | 0.92±0.11 | 0.83±0.08 | 0.58±0.07 | 1±0       |
| chrIX*  | 8,521,935  | 8,537,559  | 0.11±0.05 | 0.04±0.06 | 0.16±0.07 | 0.43±0.11 | 0.55±0.09 | 0.69±0.06 | 0.55±0.04 | 0.79±0.15 |
| chrIX*  | 8,901,816  | 8,910,115  | 0.13±0.04 | 0.08±0.07 | 0.22±0.09 | 0.46±0.12 | 0.55±0.09 | 0.16±0.28 | 0.63±0.15 | 0.72±0.2  |
| chrIX   | 9,208,158  | 9,227,809  | 0.14±0.06 | 0.05±0.06 | 0.41±0.09 | 0.66±0.09 | 0.75±0.1  | 0.67±0.06 | 0.97±0.05 | 1±0       |
| chrIX   | 10,334,101 | 10,353,801 | 0.12±0.05 | 0.07±0.06 | 0.28±0.08 | 0.73±0.09 | 0.7±0.07  | 0.9±0.08  | 1±0.01    | 1±0.01    |
| chrXI*  | 5,445,757  | 5,456,249  | 0.06±0.06 | 0.02±0.04 | 0.13±0.08 | 0.47±0.14 | 0.74±0.09 | 0.1±0.08  | 0.73±0.13 | 0.71±0.15 |
| chrXI*  | 5,457,608  | 5,510,580  | 0.05±0.05 | 0.04±0.05 | 0.13±0.07 | 0.48±0.12 | 0.78±0.09 | 0.1±0.07  | 0.71±0.11 | 0.78±0.15 |
| chrXI*  | 5,511,288  | 5,556,511  | 0.06±0.06 | 0.03±0.05 | 0.16±0.08 | 0.48±0.12 | 0.8±0.09  | 0.12±0.09 | 0.72±0.11 | 0.81±0.14 |
| chrXI*  | 5,562,142  | 5,606,534  | 0.04±0.05 | 0.02±0.04 | 0.15±0.09 | 0.49±0.13 | 0.78±0.09 | 0.09±0.08 | 0.72±0.1  | 0.79±0.13 |
| chrXI*  | 5,609,100  | 5,630,872  | 0.04±0.05 | 0.02±0.04 | 0.2±0.12  | 0.48±0.11 | 0.8±0.08  | 0.07±0.08 | 0.75±0.11 | 0.8±0.11  |
| chrXI*  | 5,631,913  | 5,648,416  | 0.04±0.05 | 0.01±0.02 | 0.12±0.08 | 0.46±0.12 | 0.79±0.09 | 0.11±0.12 | 0.75±0.11 | 0.75±0.11 |
| chrXI*  | 5,672,122  | 5,711,862  | 0.06±0.05 | 0.04±0.06 | 0.14±0.1  | 0.49±0.12 | 0.79±0.09 | 0.11±0.09 | 0.73±0.11 | 0.81±0.14 |
| chrXI*  | 5,714,308  | 5,756,262  | 0.06±0.05 | 0.06±0.06 | 0.14±0.07 | 0.48±0.14 | 0.74±0.14 | 0.1±0.06  | 0.72±0.12 | 0.78±0.15 |
| chrXI*  | 5,756,905  | 5,817,640  | 0.06±0.06 | 0.05±0.06 | 0.18±0.1  | 0.5±0.12  | 0.78±0.09 | 0.12±0.1  | 0.76±0.13 | 0.8±0.15  |
| chrXI*  | 5,818,096  | 5,855,124  | 0.06±0.05 | 0.03±0.05 | 0.12±0.06 | 0.47±0.11 | 0.78±0.09 | 0.1±0.05  | 0.69±0.09 | 0.78±0.15 |

|         |            |            |           |           |           |           |           |           |           |           |
|---------|------------|------------|-----------|-----------|-----------|-----------|-----------|-----------|-----------|-----------|
| chrXII  | 14,338,229 | 14,358,336 | 0.15±0.04 | 0.1±0.06  | 0.12±0.06 | 0.41±0.11 | 0.84±0.11 | 0.83±0.08 | 1±0.02    | 1±0       |
| chrXII  | 16,522,028 | 16,530,706 | 0.08±0.05 | 0.05±0.08 | 0.33±0.05 | 0.44±0.11 | 0.99±0.02 | 0.29±0.08 | 0.95±0.07 | 0.99±0.03 |
| chrXII  | 16,537,728 | 16,538,810 | 0.07±0.07 | 0.06±0.07 | 0.32±0.09 | 0.37±0.08 | 0.98±0.03 | 0.28±0.03 | 0.93±0.08 | 0.99±0.02 |
| chrXIX  | 2,449,903  | 2,508,206  | 0.13±0.04 | 0.07±0.06 | 0.36±0.1  | 0.93±0.13 | 0.76±0.12 | 0.69±0.08 | 1±0.01    | 1±0       |
| chrXIX  | 2,543,385  | 2,553,623  | 0.12±0.07 | 0.06±0.08 | 0.39±0.16 | 0.91±0.15 | 0.69±0.06 | 0.64±0.11 | 0.99±0.05 | 0.99±0.04 |
| chrXIX  | 2,573,853  | 2,581,858  | 0.1±0.06  | 0.06±0.06 | 0.28±0.08 | 0.88±0.15 | 0.69±0.07 | 0.58±0.08 | 1±0       | 1±0       |
| chrXIX  | 14,787,904 | 14,799,088 | 0.09±0.06 | 0.05±0.06 | 0.24±0.07 | 0.49±0.18 | 0.61±0.12 | 0.37±0.13 | 0.99±0.04 | 0.98±0.05 |
| chrXXI* | 5,759,879  | 5,776,968  | 0.04±0.06 | 0.02±0.05 | 0.28±0.07 | 0.29±0.12 | 0.46±0.12 | 0.24±0.22 | 0.7±0.11  | 0.6±0.1   |
| chrXXI* | 5,790,637  | 5,816,820  | 0.01±0.02 | 0.05±0.06 | 0.36±0.1  | 0.59±0.13 | 0.47±0.08 | 0.01±0.05 | 0.66±0.08 | 0.58±0.07 |
| chrXXI* | 5,817,730  | 5,829,114  | 0±0.01    | 0.02±0.04 | 0.35±0.09 | 0.55±0.16 | 0.47±0.1  | 0±0       | 0.68±0.09 | 0.59±0.08 |
| chrXXI* | 5,835,764  | 5,914,891  | 0±0.02    | 0.03±0.05 | 0.36±0.09 | 0.57±0.13 | 0.47±0.1  | 0±0.03    | 0.7±0.1   | 0.58±0.08 |
| chrXXI* | 5,919,392  | 5,929,442  | 0.01±0.02 | 0.02±0.03 | 0.34±0.06 | 0.55±0.11 | 0.44±0.09 | 0±0       | 0.71±0.07 | 0.57±0.05 |
| chrXXI* | 5,930,066  | 5,939,357  | 0.01±0.04 | 0.03±0.05 | 0.37±0.09 | 0.59±0.15 | 0.42±0.09 | 0.02±0.04 | 0.65±0.13 | 0.66±0.19 |
| chrXXI* | 5,940,493  | 5,981,085  | 0±0.02    | 0.03±0.05 | 0.36±0.1  | 0.6±0.12  | 0.46±0.11 | 0.01±0.03 | 0.71±0.14 | 0.59±0.11 |
| chrXXI* | 5,982,524  | 6,116,717  | 0.01±0.02 | 0.03±0.05 | 0.36±0.1  | 0.59±0.12 | 0.47±0.09 | 0.01±0.05 | 0.69±0.1  | 0.6±0.08  |
| chrXXI* | 6,117,537  | 6,148,626  | 0±0.01    | 0.02±0.04 | 0.35±0.09 | 0.57±0.11 | 0.47±0.09 | 0.01±0.05 | 0.69±0.14 | 0.59±0.08 |
| chrXXI* | 6,152,036  | 6,160,856  | 0±0.02    | 0.02±0.05 | 0.37±0.05 | 0.67±0.14 | 0.48±0.13 | 0.03±0.12 | 0.75±0.1  | 0.6±0.11  |
| chrXXI* | 6,162,338  | 6,387,109  | 0±0.02    | 0.03±0.05 | 0.35±0.09 | 0.59±0.12 | 0.47±0.1  | 0.01±0.05 | 0.69±0.1  | 0.58±0.08 |

|         |           |           |           |           |           |           |           |           |           |           |
|---------|-----------|-----------|-----------|-----------|-----------|-----------|-----------|-----------|-----------|-----------|
| chrXXI* | 6,387,893 | 6,401,909 | 0.01±0.02 | 0.02±0.04 | 0.35±0.07 | 0.58±0.1  | 0.48±0.08 | 0±0.01    | 0.66±0.09 | 0.55±0.08 |
| chrXXI* | 6,415,345 | 6,625,069 | 0.01±0.02 | 0.03±0.05 | 0.36±0.1  | 0.57±0.15 | 0.47±0.12 | 0.01±0.04 | 0.69±0.11 | 0.59±0.09 |
| chrXXI* | 6,627,144 | 6,644,932 | 0.01±0.01 | 0.04±0.06 | 0.38±0.11 | 0.6±0.14  | 0.47±0.1  | 0.03±0.11 | 0.71±0.14 | 0.59±0.07 |
| chrXXI* | 6,645,868 | 6,675,900 | 0±0.02    | 0.02±0.05 | 0.36±0.08 | 0.6±0.13  | 0.46±0.11 | 0.01±0.04 | 0.65±0.1  | 0.59±0.09 |
| chrXXI* | 6,677,055 | 6,806,865 | 0±0.02    | 0.03±0.05 | 0.35±0.1  | 0.6±0.13  | 0.46±0.1  | 0.01±0.05 | 0.68±0.11 | 0.58±0.08 |
| chrXXI* | 6,811,271 | 6,822,421 | 0.01±0.01 | 0.02±0.04 | 0.34±0.12 | 0.54±0.1  | 0.46±0.08 | 0.02±0.09 | 0.68±0.11 | 0.58±0.07 |
| chrXXI* | 6,822,926 | 6,838,750 | 0±0.02    | 0.03±0.05 | 0.33±0.07 | 0.57±0.1  | 0.44±0.1  | 0±0       | 0.65±0.09 | 0.58±0.07 |
| chrXXI* | 6,840,532 | 6,849,088 | 0±0.01    | 0.02±0.04 | 0.32±0.1  | 0.55±0.1  | 0.46±0.07 | 0±0.01    | 0.65±0.1  | 0.55±0.07 |
| chrXXI* | 6,853,153 | 6,885,035 | 0±0.01    | 0.02±0.04 | 0.35±0.1  | 0.58±0.13 | 0.46±0.11 | 0±0.01    | 0.7±0.11  | 0.58±0.08 |
| chrXXI* | 6,885,335 | 6,895,947 | 0.02±0.05 | 0.04±0.05 | 0.35±0.07 | 0.58±0.14 | 0.47±0.12 | 0.02±0.07 | 0.71±0.13 | 0.61±0.06 |
| chrXXI* | 6,897,734 | 6,949,514 | 0±0.02    | 0.02±0.04 | 0.39±0.1  | 0.62±0.15 | 0.46±0.11 | 0±0.01    | 0.69±0.11 | 0.61±0.1  |
| chrXXI* | 6,952,798 | 6,988,645 | 0.01±0.03 | 0.03±0.05 | 0.36±0.1  | 0.61±0.13 | 0.5±0.1   | 0.03±0.13 | 0.69±0.12 | 0.58±0.07 |
| chrXXI* | 6,990,542 | 6,999,498 | 0±0.01    | 0.02±0.04 | 0.34±0.08 | 0.61±0.15 | 0.45±0.1  | 0±0       | 0.68±0.13 | 0.6±0.1   |
| chrXXI* | 7,001,769 | 7,013,989 | 0.01±0.03 | 0.03±0.04 | 0.35±0.11 | 0.61±0.07 | 0.5±0.09  | 0±0       | 0.68±0.07 | 0.57±0.06 |
| chrXXI* | 7,014,476 | 7,036,127 | 0.01±0.03 | 0.03±0.05 | 0.36±0.09 | 0.57±0.11 | 0.45±0.09 | 0±0       | 0.67±0.1  | 0.57±0.06 |
| chrXXI* | 7,037,602 | 7,087,560 | 0±0.01    | 0.03±0.05 | 0.35±0.08 | 0.61±0.12 | 0.47±0.08 | 0±0.01    | 0.67±0.09 | 0.59±0.09 |
| chrXXI* | 7,092,045 | 7,191,351 | 0±0.02    | 0.04±0.05 | 0.37±0.1  | 0.61±0.12 | 0.5±0.1   | 0±0.01    | 0.71±0.13 | 0.59±0.09 |
| chrXXI* | 7,194,393 | 7,212,749 | 0±0.02    | 0.04±0.05 | 0.38±0.1  | 0.6±0.1   | 0.52±0.1  | 0.01±0.06 | 0.7±0.1   | 0.59±0.09 |

|         |           |           |        |           |           |           |          |           |           |           |
|---------|-----------|-----------|--------|-----------|-----------|-----------|----------|-----------|-----------|-----------|
| chrXXI* | 7,214,239 | 7,486,635 | 0±0.02 | 0.03±0.05 | 0.35±0.09 | 0.59±0.12 | 0.47±0.1 | 0.01±0.04 | 0.69±0.11 | 0.59±0.08 |
|---------|-----------|-----------|--------|-----------|-----------|-----------|----------|-----------|-----------|-----------|

**Table S7. Mean frequencies of freshwater alleles in each population for DIs found in our study without merging procedure, mean ± st. dev.**
